# Supplementary material
Source: Springer Nature journal article supplement (https://www.springermedizin.de/resource/supplementary/12974_2011_426_MOESM3_ESM.pdf/9601240)

**A.****Temporal Lobe**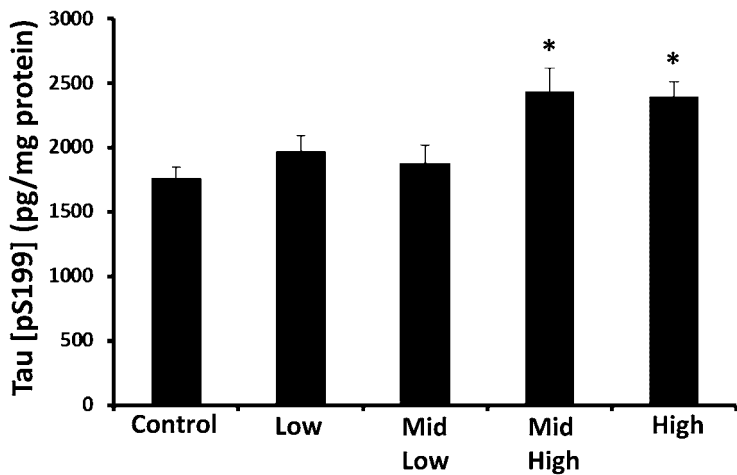**B.****Frontal Lobe**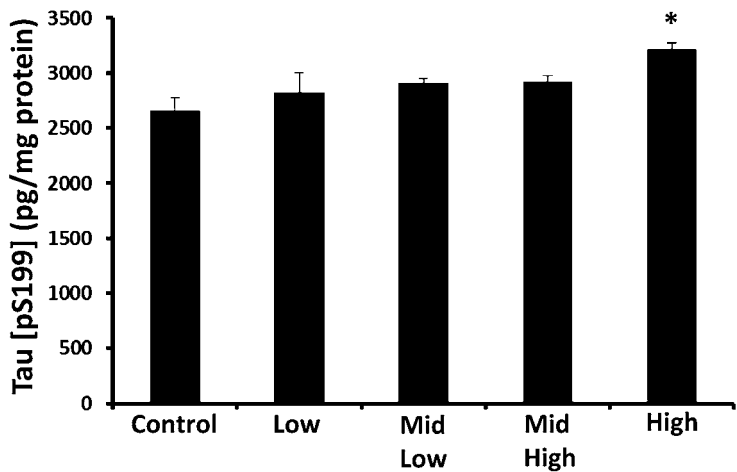

Supplement: MOESM3 [file 9601240]
